# Supplementary material
Source: publisher figshare collection journal article supplement (https://acs.figshare.com/ndownloader/files/15379286)
Supplement: Supplementary file 1 [file 15379286]

# Co-production of Hydrogen and Methanol from Methane by Chemical Looping Reforming

*Xinhe Wang<sup>a</sup>, Xuancheng Du<sup>b</sup>, Wenbo Yu<sup>b</sup>, Junshe Zhang<sup>b,\*</sup>, Jinjia Wei<sup>a,b,\*</sup>*

<sup>a</sup>State Key Laboratory of Multiphase Flow in Power Engineering, Xi'an Jiaotong University,

Xi'an, Shaanxi 710049, China

<sup>b</sup>School of Chemical Engineering and Technology, Xi'an Jiaotong University, Xi'an, Shaanxi

710049, China

\*jzhang08@xjtu.edu.cn (Junsshe Zhang), \*jjwei@mail.xjtu.edu.cn (Jinjia Wei)

## Supporting text

**Figure S1.** Thermodynamic analysis of methane POx/CO<sub>2</sub>-splitting reactions and selected redox materials.

**Figure S2.** Experimental setup of performance testing.

**Figure S3.** XRD patterns of SF-C (a) and SF-M (b) samples.

**Figure S4.** SEM images of SF-CM sample: as-prepared (a), SF-CM CH<sub>4</sub>-reduced (b), H<sub>2</sub>O-regenerated (c). Reaction conditions:  $m_{\text{SF-CM}}=2$  g;  $T=900$  °C,  $F_{\text{ox}}=200$  STP mL/min (5 vol.% methane),  $F_{\text{re}}=194.5$  STP mL/min (2.31 vol.% steam),  $P=1$  atm.

**Figure S5.** Iron size distribution of the 10<sup>th</sup> reduced SF-CM sample.

**Figure S6.** Flow diagram of MeH<sub>2</sub> scheme.

**Figure S7.** Flow diagram of MeOH scheme.

**Figure S8.** Influence of the price of methanol (a), natural gas (b), hydrogen (c) and electricity (d) on net income of MeH<sub>2</sub> and MeOH schemes.

**Figure S9.** The Grand Composite Curve of MeH<sub>2</sub> (a) and MeOH (b) schemes.

**Table S1.** Bulk composition of as-prepared SF-CM sample.

**Table S2.** Stream table of MeH<sub>2</sub> scheme.

**Table S3.** Stream table of MeOH scheme.

**Table S4.** The price of feedstocks, products and electricity.

**Table S5.** Energy requirements of MeH<sub>2</sub> and MeOH scheme.

Reference

### Supporting text

In methane POx step, methane conversion, syngas and coke selectivity were calculated as follows,

$$n_{CH_4,i} = t_{ox} F_{CH_4,i} \quad (S1)$$

$$n_{CH_4,o} = \int_0^{t_{ox}} F_{CH_4,o} dt \quad (S2)$$

$$n_{H_2,ox} = \int_0^{t_{ox}} F_{H_2,ox} dt \quad (S3)$$

$$n_{CO,ox} = \int_0^{t_{ox}} F_{CO,ox} dt \quad (S4)$$

$$n_{CO_2,ox} = \int_0^{t_{ox}} F_{CO_2,ox} dt \quad (S5)$$

$$n_{ox} = n_{CO,ox} + 4 \times n_{CO_2,ox} \quad (S6)$$

$$X_{CH_4}(\%) = 100\% \times \frac{n_{CH_4,i} - n_{CH_4,o}}{n_{CH_4,i}} \quad (S7)$$

$$X_{CH_4,ins}(\%) = 100\% \times \frac{F_{CH_4,i} - F_{CH_4,o}}{F_{CH_4,i}} \quad (S8)$$

$$S_{Syn}(\%) = 100\% \times \frac{n_{CO,ox} + n_{H_2,ox}}{3(n_{CH_4,i} - n_{CH_4,o})} \quad (S9)$$

$$S_{coke}(\%) = 100\% \times \frac{n_{coke}}{n_{CH_4,i} - n_{CH_4,o}} \quad (S10)$$

where  $n_{H_2,ox}$ ,  $n_{CO,ox}$ ,  $n_{CO_2,ox}$ ,  $n_{coke}$  and  $n_{ox}$  are the total mole numbers of  $H_2$ ,  $CO$ ,  $CO_2$ , coke produced, and oxygen transferred, respectively.  $n_{CH_4,i}$  and  $n_{CH_4,o}$  are total mole numbers of input and output methane, respectively.  $F_{CH_4,o}$ ,  $F_{H_2,ox}$ ,  $F_{CO,ox}$  and  $F_{CO_2,ox}$  are the molar flowrates of output  $CH_4$ ,  $H_2$ ,  $CO$ , and  $CO_2$ , respectively.  $F_{CH_4,i}$  is the molar flowrate of input methane.  $t_{ox}$  is the period of POx step.  $X_{CH_4}$  is methane conversion,

$X_{CH_4,ins}$  is the instantaneous methane conversion.  $S_{syn}$  and  $S_{coke}$  are syngas selectivity and coke selectivity, respectively.

In water splitting step, water conversion and hydrogen purity were calculated as follows,

$$n_{H_2O} = \int_0^{t_{re}} F_{Ar} \frac{c_{H_2O}}{1-c_{H_2O}} dt \quad (S1)$$

$$n_{H_2,re} = \int_0^{t_{re}} F_{H_2,re} dt \quad (S12)$$

$$n_{CO,re} = \int_0^{t_{re}} F_{CO,re} dt \quad (S13)$$

$$n_{CO_2,re} = \int_0^{t_{re}} F_{CO_2,re} dt \quad (S14)$$

$$n_{coke} = n_{CO,re} + n_{CO_2,re} \quad (S15)$$

$$X_{H_2O}(\%) = 100\% \times \frac{n_{H_2,re}}{n_{H_2O}} \quad (S16)$$

$$P_{H_2}(\%) = 100\% \times \frac{n_{H_2,re}}{n_{H_2,re} + n_{CO,re} + n_{CO_2,re}} \quad (S17)$$

where  $n_{H_2O}$  is the total mole number of water fed to the reactor.  $c_{H_2O}$  is the concentration of steam in the feed.  $n_{H_2,re}$ ,  $n_{CO,re}$ , and  $n_{CO_2,re}$  are the total mole numbers of  $H_2$ ,  $CO$ , and  $CO_2$  produced, respectively.  $F_{Ar}$  is the molar flowrate of argon.  $F_{H_2,re}$ ,  $F_{CO,re}$ , and  $F_{CO_2,re}$  represent the molar flowrates of output  $H_2$ ,  $CO$  and  $CO_2$ , respectively.  $t_{re}$  is the period of water splitting step.  $X_{H_2O}$  represents  $H_2O$  to  $H_2$  conversion.  $P_{H_2}$  is the purity of hydrogen product.

The system exergy efficiency was calculated as follows,

$$E_{ex,ch,i} = F_i E_{ex,ch,s,i} \quad (S18)$$

$$E_{ex,ph,i} = F_i (H_i - H_{0,i} - T_0 (S_i - S_{0,i})) \quad (S19)$$

$$E_{ex,W,j} = W_j \quad (S20)$$

$$E_{ex} = \sum E_{ex,ch,i} + \sum E_{ex,ph,i} + \sum E_{ex,W,j} + \sum E_{ex,q,k} \quad (S21)$$

$$E_{ex,q,k} = Q_k \left(1 - \frac{T_0}{T_k}\right) \quad (S22)$$

$$\eta_{ex,s} = \frac{E_{ex,out}}{E_{ex,in}} \quad (S23)$$

where  $E_{ex,ch,i}$  is chemical exergy of each stream<sup>1</sup>.  $E_{ex,ph,i}$  is the physical exergy of each stream.  $E_{ex,W,j}$  is work exergy of each work input.  $E_{ex,q,k}$  is heat exergy of each heat input.  $i, j, k$  represents the components of the stream, work, and heat.  $F_i$  is the flowrate of component  $i$  in the stream.  $H_i$  and  $S_i$  are the enthalpy and entropy of component  $i$  in the stream.  $T_0$  is the environmental temperature, and  $S_{0,i}$  is the entropy of compound  $i$  at  $T_0$ .  $T_k$  is the temperature of heat flow  $k$ , and  $Q_k$  is the heat into or out of the system of heat flow  $k$ .  $E_{ex}$  represents the exergy of the system which includes chemical exergy and physical exergy of the stream, work exergy and heat exergy.  $E_{ex,out}$  and  $E_{ex,in}$  are the total output and input exergy of the system, respectively.  $\eta_{ex,s}$  is the exergy efficiency.

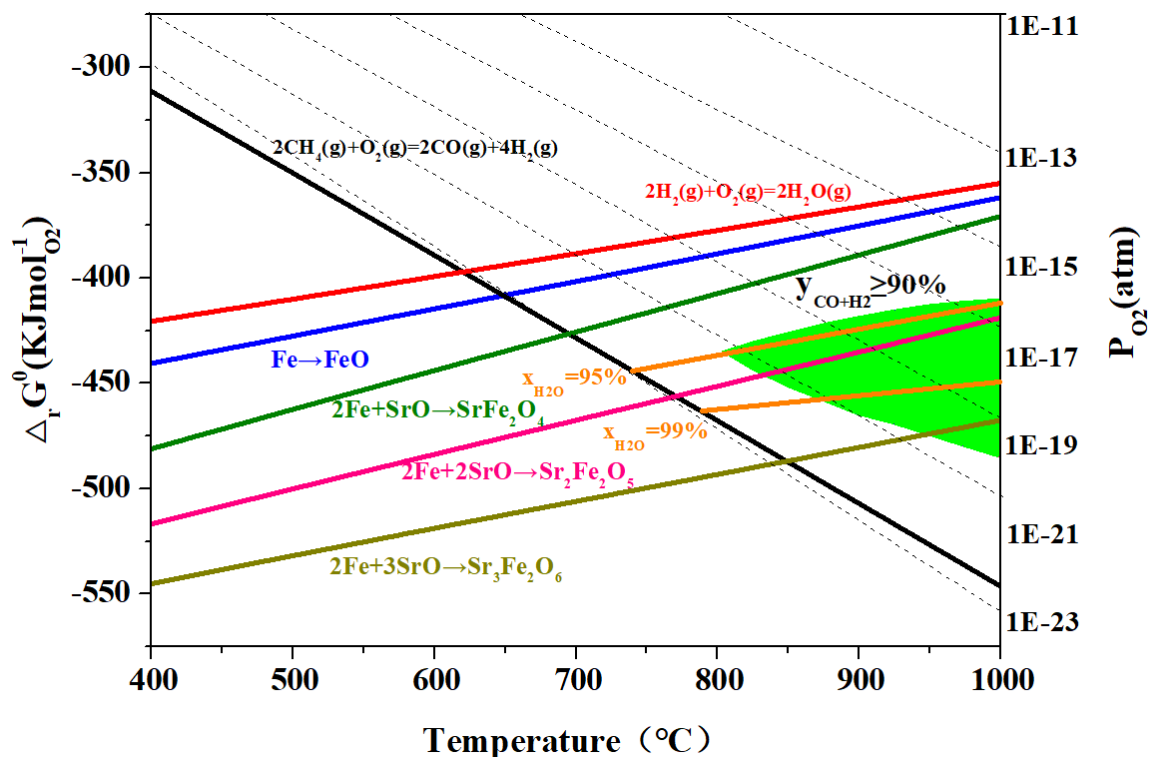

**Figure S1.** Thermodynamic analysis of methane PO<sub>x</sub>/CO<sub>2</sub>-splitting reactions and selected redox materials.

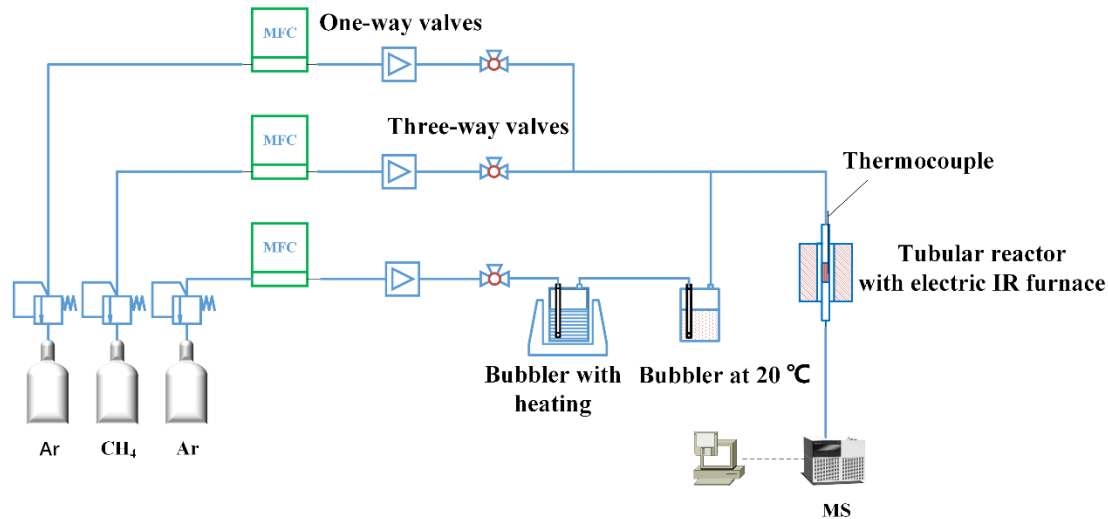

**Figure S2.** Experimental setup of performance testing.

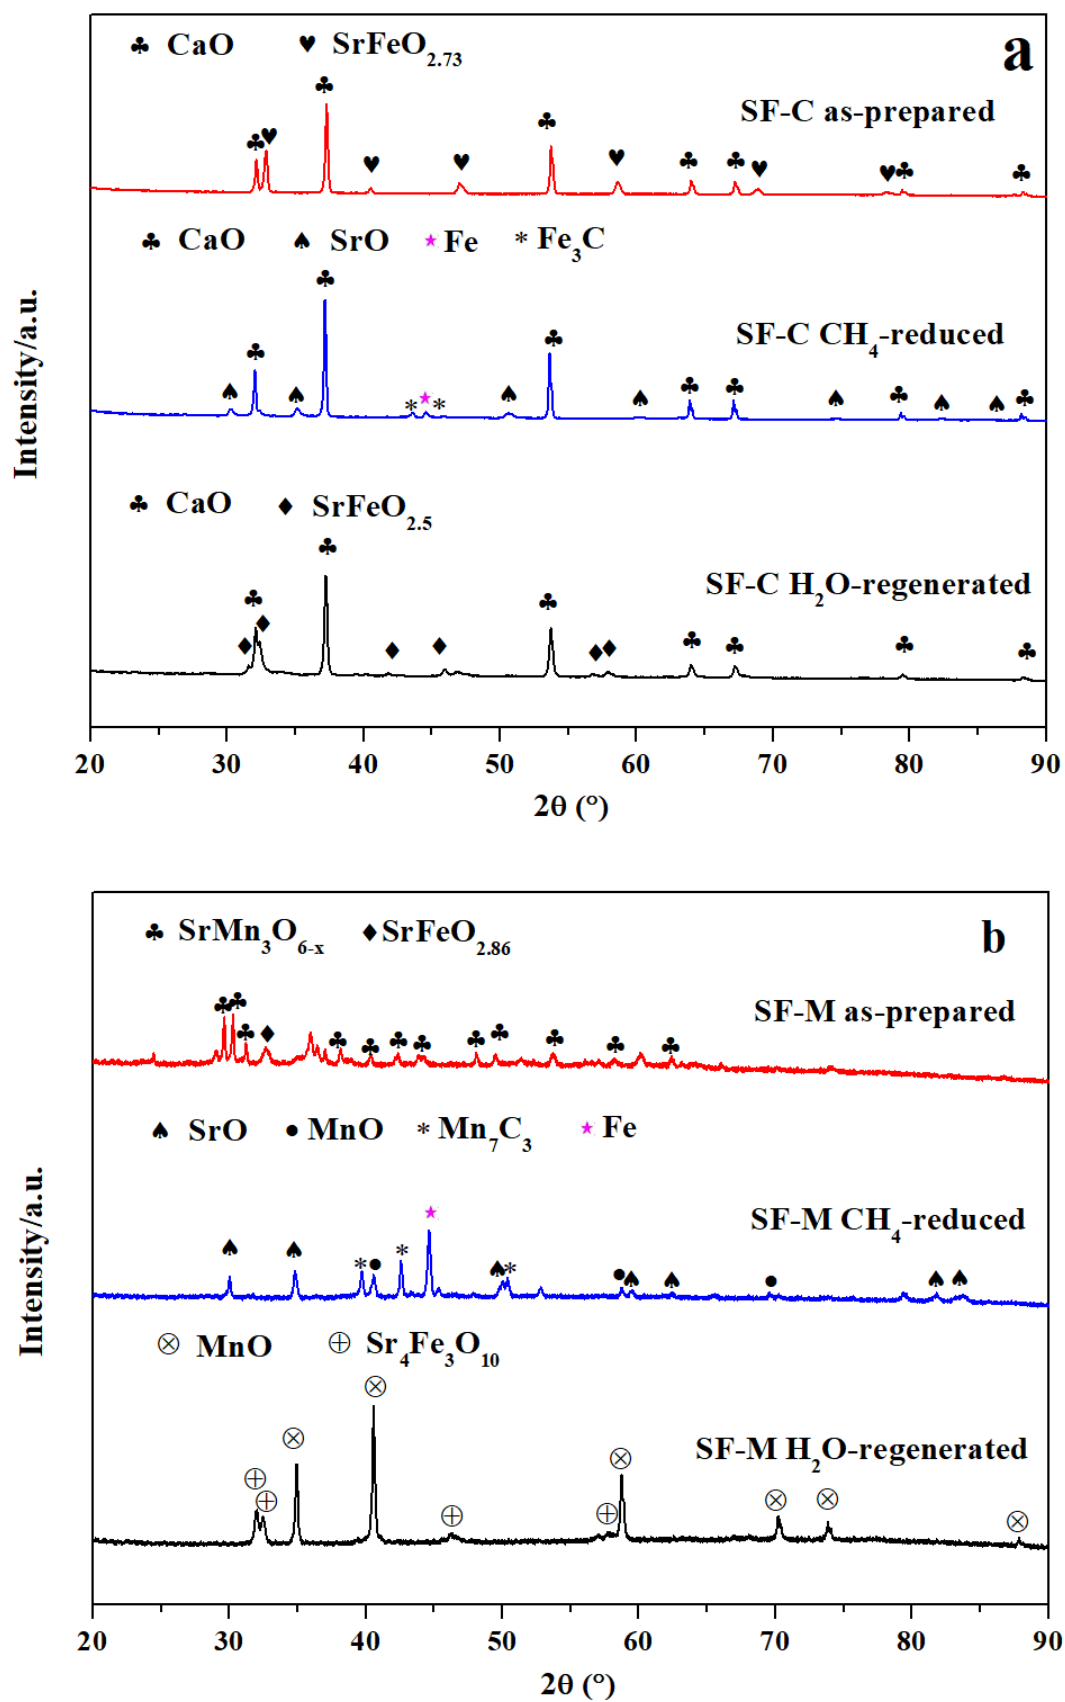

**Figure S3.** XRD patterns of SF-C (a) and SF-M (b) samples.

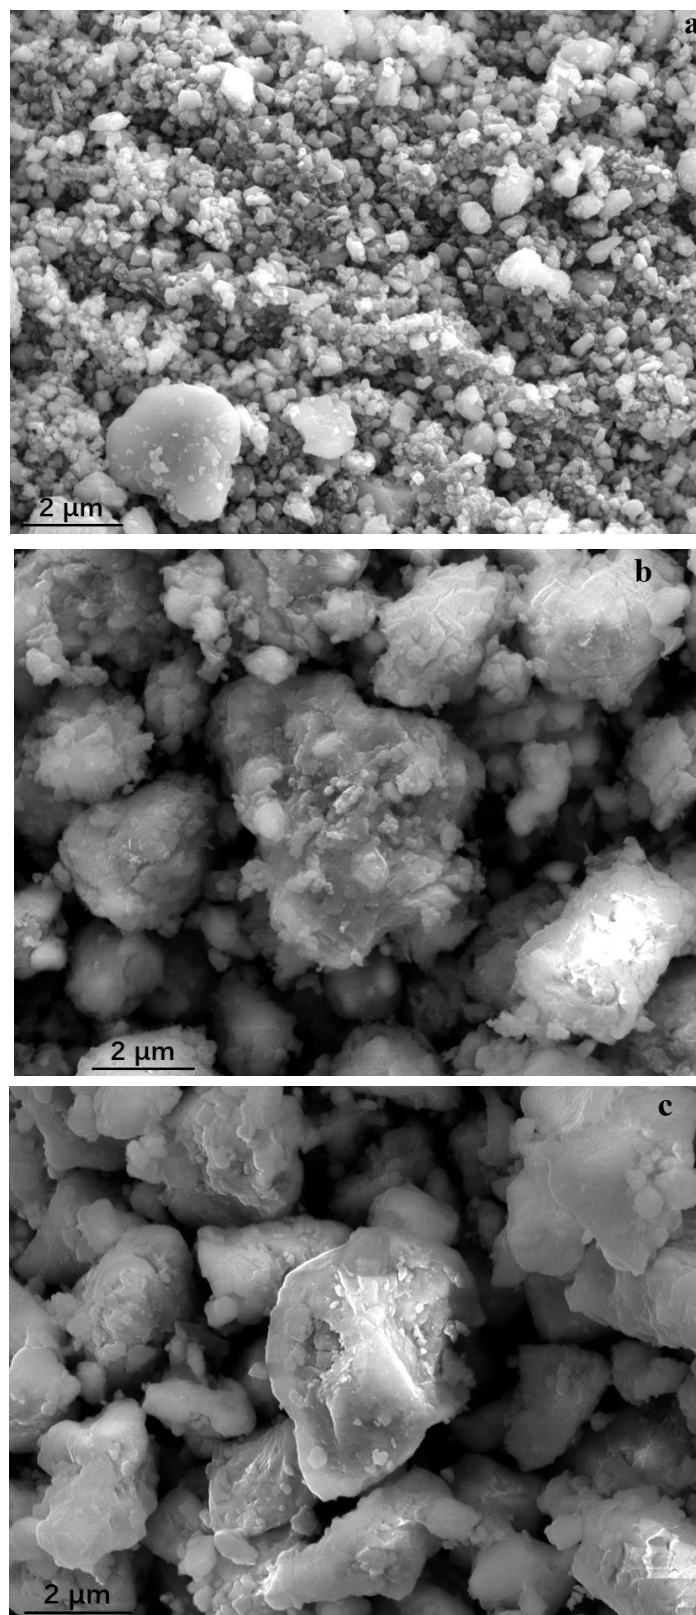

**Figure S4.** SEM images of SF-CM sample: as-prepared (a), SF-CM CH<sub>4</sub>-reduced (b), H<sub>2</sub>O-regenerated (c). Reaction conditions:  $m_{\text{SF-CM}}=2$  g;  $T=900$  °C,  $F_{\text{ox}}=200$  STP mL/min (5 vol.% methane),  $F_{\text{re}}=194.5$  STP mL/min (2.31 vol.% steam),  $P=1$  atm.



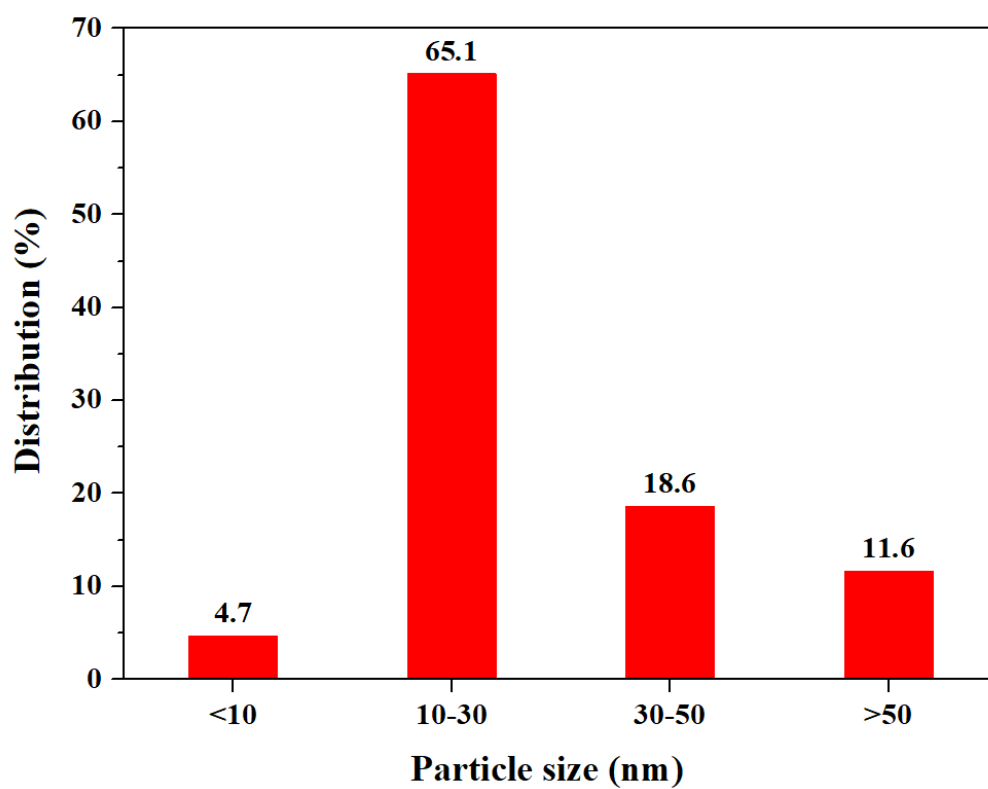

**Figure S5.** Iron size distribution of the 10<sup>th</sup> reduced SF-CM sample.



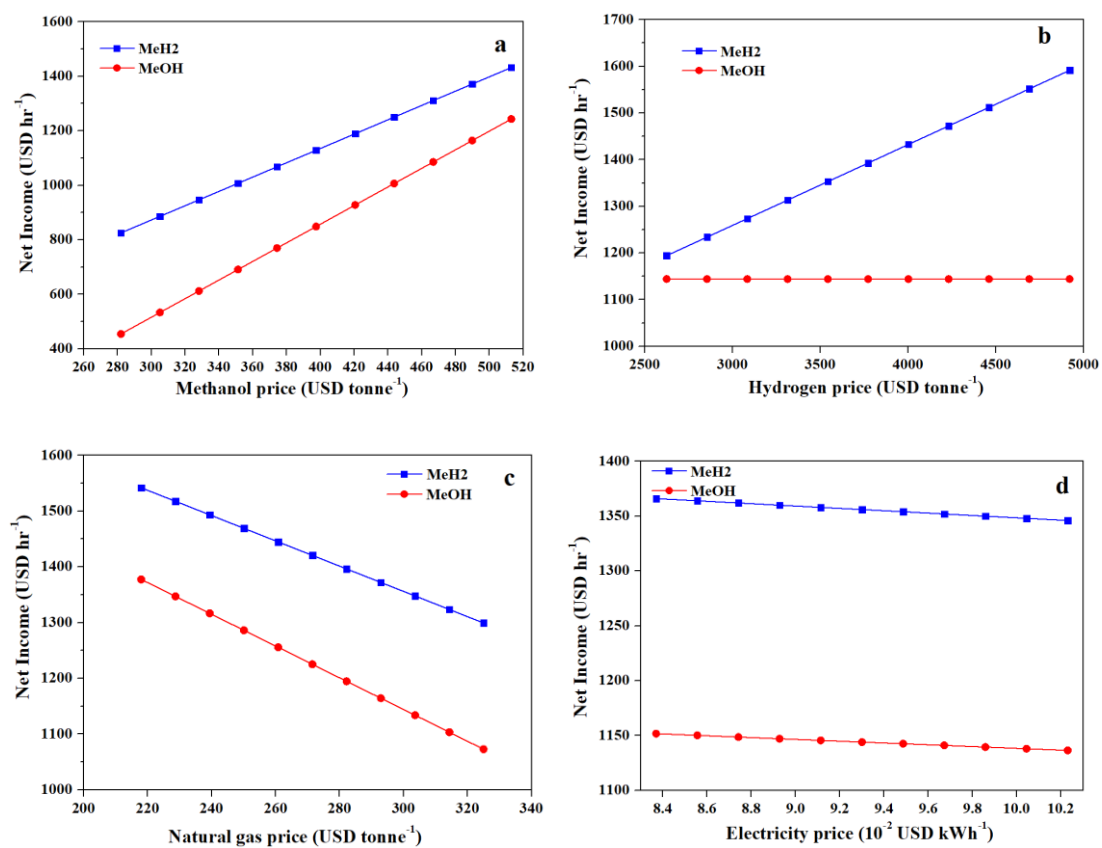

**Figure S8.** The effect of methanol (a), hydrogen (b), natural gas (c), and electricity (d) price on the net income of solar-driven processes.

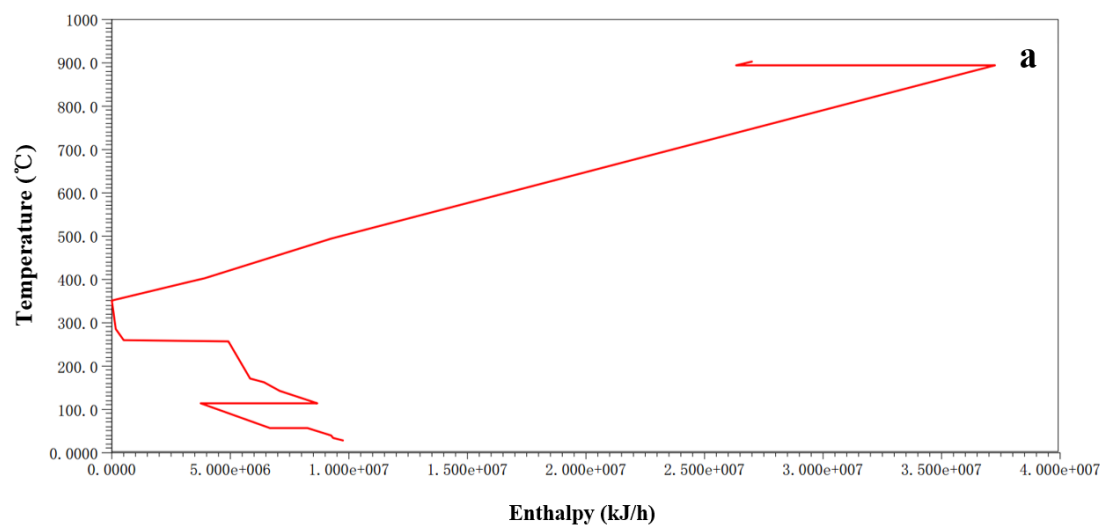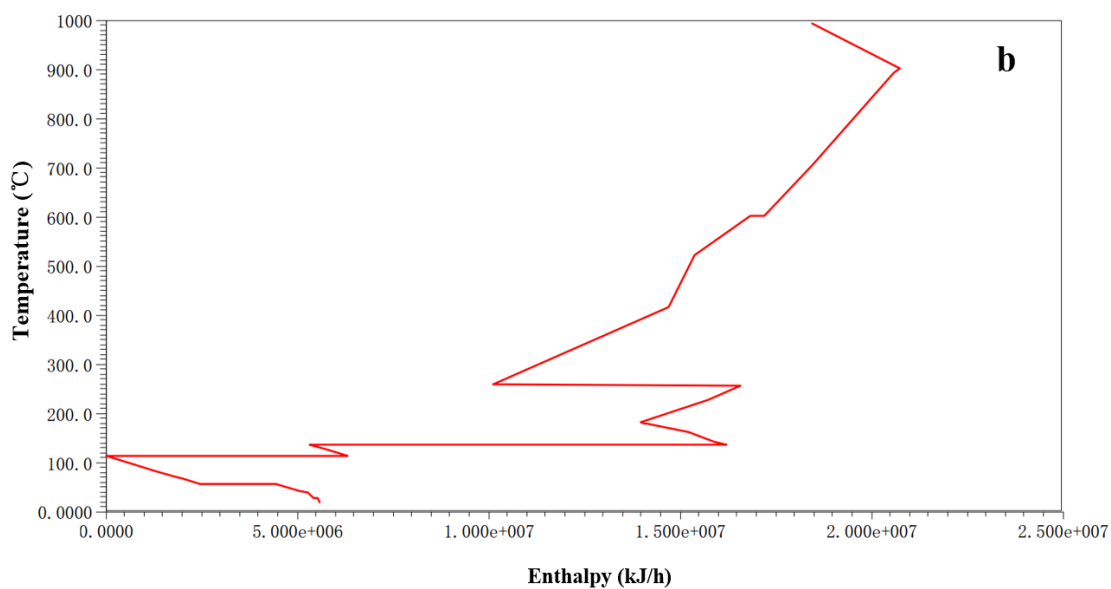

**Figure S9.** The Grand Composite Curve of MeH<sub>2</sub> (a) and MeOH (b) scheme.

**Table S1.** Bulk composition of as-prepared of SF-CM sample.

| Element | Measured molar ratio <sup>*</sup> | Calculated molar ratio |
|---------|-----------------------------------|------------------------|
| Sr      | 1.05                              | 1.00                   |
| Fe      | 1.00(Ref.)                        | 1.00(Ref.)             |
| Ca      | 4.55 <sup>†</sup>                 | 3.52                   |
| Mn      | 3.02                              | 3.52                   |

<sup>\*</sup>ICP-MS measurement<sup>†</sup>Measurement uncertainty is large

**Table S2.** Stream table of MeH<sub>2</sub> scheme.

|                     | S1       | S2       | S3                     | S4        | S12       | S15       | S22       | S31                        |
|---------------------|----------|----------|------------------------|-----------|-----------|-----------|-----------|----------------------------|
|                     | To RED   | To OXI   | H <sub>2</sub> product | To HRSG   | To WGS    | To WGS    | To MeOH   | CH <sub>3</sub> OH product |
| Mole Flow (kmol/s)  |          |          |                        |           |           |           |           |                            |
| CO                  | 0        | 0        | 0                      | 0.0235125 | 0         | 0.0058781 | 0.0282932 | 3.64E-08                   |
| CO <sub>2</sub>     | 0        | 0        | 0                      | 0.0002375 | 0         | 5.938E-05 | 0.0278314 | 0.000281                   |
| H <sub>2</sub>      | 0        | 0        | 0.0239679              | 0.0475    | 0         | 0.011875  | 0.1652062 | 2.309E-07                  |
| H <sub>2</sub> O    | 0        | 0.02421  | 0.0002421              | 0         | 0.0230555 | 0         | 0.0004455 | 5.025E-08                  |
| N <sub>2</sub>      | 0        | 0        | 0                      | 0         | 0         | 0         | 0         | 0                          |
| O <sub>2</sub>      | 0        | 0        | 0                      | 0         | 0         | 0         | 0         | 0                          |
| CH <sub>4</sub>     | 0.025    | 0        | 0                      | 0.00125   | 0         | 0.0003125 | 0.0313874 | 2.82E-06                   |
| MeOH                | 0        | 0        | 0                      | 0         | 0         | 0         | 0.0011001 | 0.0228131                  |
| Mole Fraction       |          |          |                        |           |           |           |           |                            |
| CO                  | 0        | 0        | 0                      | 0.3243103 | 0         | 0.3243103 | 0.1112751 | 1.576E-06                  |
| CO <sub>2</sub>     | 0        | 0        | 0                      | 0.0032759 | 0         | 0.0032759 | 0.1094589 | 0.0121672                  |
| H <sub>2</sub>      | 0        | 0        | 0.99                   | 0.6551724 | 0         | 0.6551724 | 0.649743  | 9.995E-06                  |
| H <sub>2</sub> O    | 0        | 1        | 0.01                   | 0         | 1         | 0         | 0.001752  | 2.176E-06                  |
| N <sub>2</sub>      | 0        | 0        | 0                      | 0         | 0         | 0         | 0         | 0                          |
| O <sub>2</sub>      | 0        | 0        | 0                      | 0         | 0         | 0         | 0         | 0                          |
| CH <sub>4</sub>     | 1        | 0        | 0                      | 0.0172413 | 0         | 0.0172413 | 0.1234443 | 0.0001221                  |
| MeOH                | 0        | 0        | 0                      | 0         | 0         | 0         | 0.0043268 | 0.987697                   |
| Total Flow (kmol/s) | 0.025    | 0.02421  | 0.02421                | 0.0725    | 0.0230555 | 0.018125  | 0.2542639 | 0.0230973                  |
| Temperature K       | 621.1232 | 407.5489 | 1173.15                | 1173.15   | 773.15    | 673.15    | 433.15    | 337.1491                   |
| Pressure (Pa)       | 2000000  | 300000   | 2026500                | 2000000   | 12400000  | 2000000   | 10000000  | 100000                     |

**Table S3.** Stream table of MeOH scheme.

|                     | S1       | S2     | S5        | S7        | S19       | S28           | S30       |
|---------------------|----------|--------|-----------|-----------|-----------|---------------|-----------|
|                     | To SMR   | To SMR | To RWGS   | To HRSG   | To MeOH   | CH3OH product | To SMR    |
| Mole Flow (kmol/s)  |          |        |           |           |           |               |           |
| CO                  | 0        | 0      | 0.0060543 | 0.0230113 | 0.0353606 | 4.864E-08     | 0         |
| CO <sub>2</sub>     | 0        | 0      | 0.0033297 | 0.0082688 | 0.0413914 | 0.0003358     | 0.0088869 |
| H <sub>2</sub>      | 0        | 0      | 0.0208174 | 0.0665613 | 0.0728989 | 1.525E-08     | 0         |
| H <sub>2</sub> O    | 0        | 0.075  | 0.0151184 | 0.0532249 | 0.0006507 | 7.412E-08     | 0         |
| N <sub>2</sub>      | 0        | 0      | 0         | 0         | 0         | 0             | 0         |
| O <sub>2</sub>      | 0        | 0      | 4.7E-20   | 1.097E-19 | 0         | 0             | 0         |
| CH <sub>4</sub>     | 0.025    | 0      | 0.000782  | 0.0026068 | 0.0879386 | 7.404E-06     | 0         |
| CH <sub>3</sub> OH  | 0        | 0      | 3.641E-09 | 1.214E-08 | 0.0018711 | 0.0296318     | 0         |
| Mole Fraction       |          |        |           |           |           |               |           |
| CO                  | 0        | 0      | 0.1313246 | 0.1497419 | 0.1472678 | 1.623E-06     | 0         |
| CO <sub>2</sub>     | 0        | 0      | 0.0722247 | 0.0538074 | 0.1723841 | 0.011204      | 1         |
| H <sub>2</sub>      | 0        | 0      | 0.451553  | 0.4331357 | 0.3036048 | 5.087E-07     | 0         |
| H <sub>2</sub> O    | 0        | 1      | 0.3279343 | 0.3463516 | 0.0027101 | 2.473E-06     | 0         |
| N <sub>2</sub>      | 0        | 0      | 0         | 0         | 0         | 0             | 0         |
| O <sub>2</sub>      | 0        | 0      | 1.02E-18  | 7.137E-19 | 0         | 0             | 0         |
| CH <sub>4</sub>     | 1        | 0      | 0.0169633 | 0.0169633 | 0.3662407 | 0.000247      | 0         |
| CH <sub>3</sub> OH  | 0        | 0      | 7.897E-08 | 7.897E-08 | 0.0077925 | 0.9885443     | 0         |
| Total Flow (kmol/s) | 0.025    | 0.075  | 0.0461019 | 0.1536732 | 0.2401115 | 0.0299752     | 0.0088869 |
| Temperature (K)     | 349.6994 | 498.15 | 873.15    | 1085.938  | 433.15    | 337.1704      | 404.101   |
| Pressure (Pa)       | 2533130  | 300000 | 200000    | 200000    | 10000000  | 100000        | 300000    |

**Table S4.** The price of the feedstock, products and electricity.

| Items       | Price           |
|-------------|-----------------|
| Hydrogen    | 3,560 USD/tonne |
| Methanol    | 484 USD/tonne   |
| Natural gas | 300 USD/tonne   |
| Electricity | 0.093 USD/kWh   |

**Table S5.** Energy requirements of MeH<sub>2</sub> and MeOH scheme.

|      | MeH <sub>2</sub> (MW) | MeOH (MW) |
|------|-----------------------|-----------|
| SMR  | N/A                   | 8.60      |
| RED  | 10.74                 | N/A       |
| OXI  | -3.05                 | N/A       |
| RWGS | N/A                   | 0.10      |
| WGS  | -0.29                 | N/A       |
| MeOH | -1.23                 | -1.80     |

**Reference**

- (1) Peters, J. F.; Petrakopoulou, F.; Dufour, J. Exergetic Analysis of a Fast Pyrolysis Process for Bio-Oil Production. *Fuel Process. Technol.* **2014**, *119*, 245–255.
